# Supplementary material
Source: Springer Nature journal article supplement (https://www.springermedizin.de/resource/supplementary/13014_2014_1104_MOESM3_ESM.pdf/9634900)

(a)

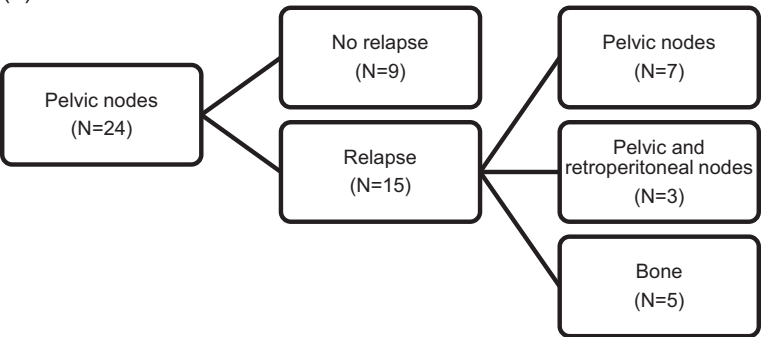

(b)

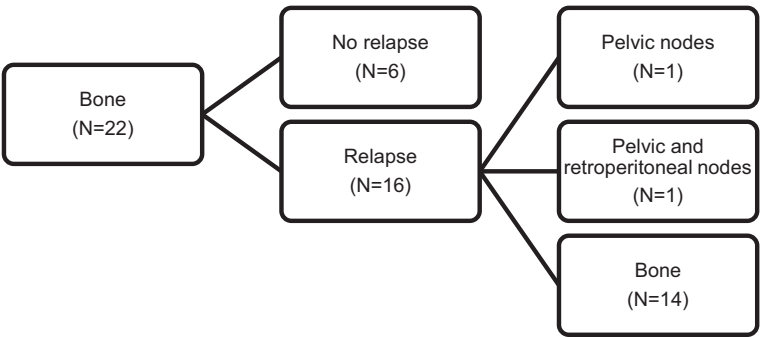

Supplement: MOESM3 [file 9634900]
